# Supplementary material
Source: PubMed Central journal article supplement (PMC2764880)
Supplement: 0909756106_0909756106SI.pdf [file 0909756106_0909756106SI.pdf]

# Supporting Information

Remedios et al. 10.1073/pnas.0909756106

## SI Materials and Methods

Behavioral and fMRI studies were performed with male rhesus macaques (*Macaca mulatta*) that are part of a colony housed at the Max-Planck Institute for Biological Cybernetics. All procedures were approved by the local authorities (Regierungspräsidium) and are in full compliance with the guidelines of the European Community (EUVD 86/609/EEC) for the care and use of laboratory animals.

Animals are socially housed in troops of 2–4 animals per enclosure, allowing for the establishment of natural hierarchical relationships. In addition to interactions within a troop, animals in one enclosure could observe animals in several other enclosures and communicate with each other by using visual and acoustic expressions. Strong gesturing, vocalizing, and territorial posturing between troops in adjacent enclosures was not uncommon. Enclosures are part of two separated facilities, allowing us to sort monkeys as either being familiar or unfamiliar to each other.

**Acquisition of Sounds and Videos.** Sounds from the animal colony were recorded while the monkeys were free within their enclosures by using a microphone (PC microphone; Telex) connected to a notebook computer and saved at 44,100 Hz (32 bit, wav files). The actual sound intensity was measured simultaneously using a condenser microphone (Brüel & Kjær 4188 and a 2238 Mediator sound level meter; Brüel & Kjær GmbH). For use in experiments, these sounds were normalized for intensity (total RMS power) and clipped to an adequate length by using Adobe Audition v2.0 (Adobe Systems).

For the behavioral and imaging experiments, four categories of sounds were used: vocalizations, drumming sounds, cage sounds, and other natural sounds. Drumming and cage sounds were especially recorded for this study. Conspecific vocalizations and other natural sounds were taken from previous studies (1, 2). Conspecific macaque vocalizations comprised coos, grunts, pant-threats, and screams. Cage sounds were sounds generated by items familiar to the animals, such sounds of a cage door, a primate-chair, or a partition being drawn. When measured, cage sounds were produced at 60–65 dB, whereas drumming sounds were much louder (81–88 dB). Other natural sounds comprised environmental and animal sounds, such as bubbling water, crickets, and vocalizations of birds and feline mammals.

Videos were recorded at 1,024 by 768 pixels at 25 frames per s by using a digital camera set on a tripod. Videos were clipped and arranged by using Adobe Premiere Pro v2.0 (Adobe Systems) and saved in Microsoft AVI format. Only clips in which the filmed animals were proximal to the cage front and with neutral expressions were considered. The relative sizes of the monkeys in the videos were maintained.

**Behavioral Tests.** Behavioral tests were based on preferential looking techniques, which are widely used to test perception in prelinguistic children and nonhuman primates (3–6). For testing, the subjects were seated in a primate chair placed in an anechoic and dark booth. Subjects were naive to the task and were not trained to perform in any respect. Importantly, the subjects were free to move their eyes and head to spontaneously orient toward stimuli of interest. Visual stimuli were presented by using a LCD monitor (117 cm; 46 in, Sharp Aquos LC-46, 60 cm in front of the subject), and sounds were presented by using two speakers set at head level, 50 cm to the left and to the right of the subject's head. The intensity of sound presentation was calibrated (see

below). All of the tests were performed in the dark, and the subject's natural behavior was recorded on digital video by using infrared light sources and cameras. Posthoc analysis was carried out in Matlab (MathWorks).

In the first experiment, we probed whether the animals preferentially orient toward sounds presented in the dark (Fig. 2A). Sounds were presented from either the left or right speaker, in a pseudorandom sequence and at random intervals. An equal number of sounds ( $n = 4$ ) from each category was used, and the side of presentation was randomized across subjects. All sounds were normalized to the same intensity 75 dB r.m.s., and to eliminate spurious influences from potential background noises and to restrict behavioral reactions to salient sounds, a continuous 60-dB masking sound (music) was continuously played as background. This choice of background sound was deliberate, so as to mimic realistic conditions, because music is regularly played in the background in the animal facilities. The orienting behavior of each subject subsequent to a sound presentation was scored by an observer that was blind to the direction or kind of sound presented. An orienting response was noted if the animal turned the head or eyes toward the side of any speaker within 5 s from the sound presentation. As in previous studies, such orienting responses were unambiguous (3, 4). For each sound category, the percentage of sounds with orienting response toward the speaker presenting the sound was scored. Fig. 2A displays the distribution of this percentage across animals and sound categories.

In the second experiment, we probed the influence of drumming or control cage sounds on the animals' preferential looking behavior toward videos showing other conspecifics. Two videos were presented on the far left and right side of the screen (each covering  $\approx 20^\circ$  of visual angle), one showing a large, the other a small animal. The large animals were significantly older and larger than the tested subjects, whereas the small animals were younger and smaller than these. The sides of presentation were balanced across subjects. A binaural sequence of drumming or cage sounds (5-s intersound interval) was presented continuously for 1 min, where each sound was presented at its "natural" intensities, which had been measured in the colony (85 dB for drumming and 65 dB for cage sounds). Importantly, although some of the subjects were unfamiliar with both monkeys shown in the movies, other subjects were familiar with either of them. Familiarity here was defined as being housed either in adjacent enclosures, ensuring regular acoustic or visual interactions. The looking behavior of each subject was scored during the 1-min stimulus presentation by an observer blind to the experimental condition. For each trial, the total time (in seconds) spent viewing either movie (or away from both) was computed. Fig. 2B displays the distribution of this total viewing time across animals.

**Functional Imaging.** Functional imaging experiments were performed with anesthetized animals and on a high-field magnet (4.7 T, Biospec 47/40v; Bruker Medical) by using established protocols (1, 7–9). Anesthesia was maintained by using fast-acting opioids (remifentanyl 0.5–2  $\mu\text{g}/\text{kg}$  per min), the animals were ventilated, and body temperature, blood oxygenation, and pressure and heart rate were continuously monitored and kept in the desired range. Signals were acquired by using whole-head volume coils, and MR-compatible headphones were positioned over both ears and sealed with sound attenuating foam. We acquired functional data from three animals (two imaged twice).

Image acquisition and acoustic stimulation protocols largely followed those used in previous studies (1, 7, 10). Functional data

were acquired with a multishot (two segments) gradient-recalled echo planar imaging sequence with typical parameters (TE, 20 ms; volume acquisition time TA, 1 s; effective TR, 10 s; flip angle, 60; spectral width, 100 kHz; on a grid of  $128 \times 128$  voxels; 2-mm slice thickness; field of view,  $96 \times 96$  mm, 9–12 slices). Anatomical images (T1-weighted) were acquired with a four-segment MDEFT sequence (TE, 4 ms; TR, 15 ms; flip angle, 20; spectral width, 75 kHz;  $384 \times 384$  voxels). The image slices were oriented parallel to the lateral sulcus to capture auditory cortex within the smallest number of slices. Anatomical and functional images were acquired on the same field of view, to facilitate superposition. Sounds were presented at an average intensity of 80 dB and were chosen from the same dataset as used in the behavioral experiments: drumming sounds, conspecific vocalizations, and other natural sounds (comprising animal vocalizations and environmental sounds). Different sound categories were presented in a pseudorandom order. During a stimulation interval, random sounds of the respective category were presented for a 40-s period (200-ms intersound interval), followed by 40-s baseline. Functional images were acquired by using a sparse imaging sequence every 10 s. This procedure leaves

sufficient time for acoustic stimulation in the absence of scanner noise.

Functional data were analyzed in Matlab (MathWorks). Time series were detrended, normalized to units of percentage signal change (vs. baseline), and two contrasts for voxels preferentially responding to vocalizations or drumming sounds constructed. The first contrast compared activations to conspecific vocalizations with those to other natural sounds, without constraints on the activation to drumming sounds. The second contrast compared activations to drumming sounds with those to other natural sounds, without constraints on the response to vocalizations. Voxels with significant effects in either contrast were identified by using spatial clustering (requiring eight active voxels in a  $4 \times 4$  neighborhood). The corresponding *P* values were computed by using a randomization procedure, by using voxels outside the brain, to ensure a false-discovery-rate of active voxels of  $<5\%$  (9). Subsequent preference maps for vocalizations and drumming sounds were displayed superimposed on the anatomical MR images (Fig. S3). To determine those regions where preferences to conspecific vocalizations and drumming sounds overlap, we determined the overlap of both preference maps (as shown in Fig. 3 and Fig. S4).

- Petkov CI, et al. (2008) A voice region in the monkey brain. *Nat Neurosci* 11:367–374.
- Kuhl PK, Meltzoff AN (1982) The bimodal perception of speech in infancy. *Science* 218:1138–1141.
- Ghazanfar AA, Logothetis NK (2003) Neuroperception: Facial expressions linked to monkey calls. *Nature* 423:937–938.
- Ghazanfar AA, Tureson HK, Maier JX, van Dinther R, Patterson RD, Logothetis NK (2007) Vocal-tract resonances as indexical cues in rhesus monkeys. *Curr Biol* 17:425–430.
- Patterson ML, Werker JF (1999) Matching phonetic information in lips and voice is robust in 4.5 month-old infants. *Infant Behav Dev* 22:237–247.
- McDermott J, Hauser MD (2007) Nonhuman primates prefer slow tempos but dislike music overall. *Cognition* 104:654–668.
- Kayser C, Petkov CI, Augath M, Logothetis NK (2007) Functional imaging reveals visual modulation of specific fields in auditory cortex. *J Neurosci* 27:1824–1835.
- Logothetis NK, Guggenberger H, Peled S, Pauls J (1999) Functional imaging of the monkey brain. *Nat Neurosci* 2:555–562.
- Tolias AS, et al. (2005) Mapping cortical activity elicited with electrical microstimulation using fMRI in the macaque. *Neuron* 48:901–911.
- Kayser C, Petkov CI, Lippert M, Logothetis NK (2005) Mechanisms for allocating auditory attention: An auditory saliency map. *Curr Biol* 15:1943–1947.
- Petkov CI, Kayser C, Augath M, Logothetis NK (2006) Functional imaging reveals numerous fields in the monkey auditory cortex. *PLoS Biol* 4:e215.

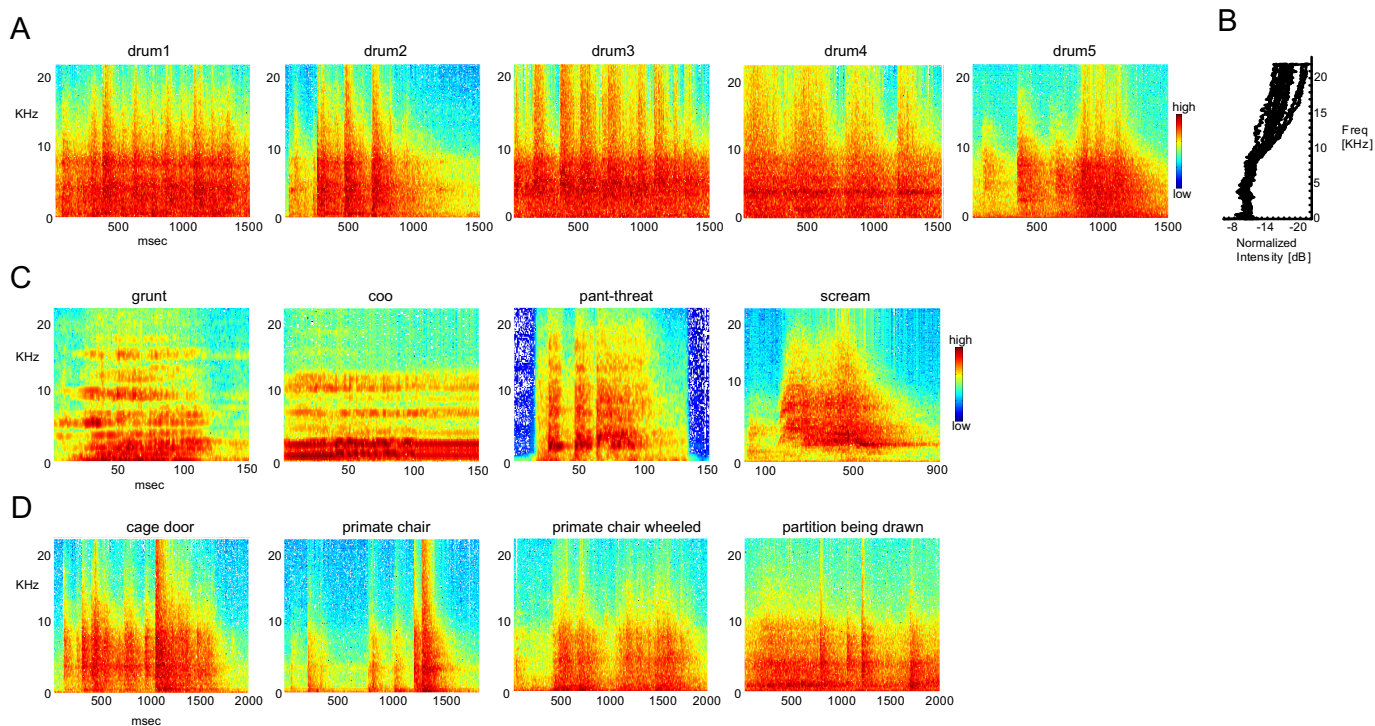

**Fig. S1.** (A) Examples of drumming sounds created by different individuals. The regular “beats” constituting drumming sounds are well visible, although their number differs between each of the sounds. (B) The spectral density at frequencies  $< 10$  kHz is well conserved across drumming samples ( $n = 13$ ). (C) Examples of different macaque vocalizations. The spectrograms illustrate that vocalizations are acoustically distinct from drumming sounds. Note that pant-threats have an apparent beat-like structure, but on a much shorter time scale than drumming sounds and with variable and irregular interbeat intervals that depend on the individual vocalization. (D) Cage sounds produced by inanimate objects feature comparable abrupt acoustic features as drumming sounds but lack the periodic beat pattern.
